# Supplementary material
Source: publisher site journal article supplement (https://www.spandidos-publications.com/1400/downloadSupplementary)
Supplement: Supplementary file 1 [file downloadSupplementary]

## Sheet: Sheet1
Table SII. Somatic mutations in PD-1 (PDCD1), PD-L1 (CD274), PD-L2 (PDCD1LG2), ADORA2A, HAVCR2, IDO1, LAG3, TIGIT, C10orf54, and VTCN1 detected in CRC.
Hugo_Symbol	NCBI_Build	Chromosome	Start_Position	End_Position	Strand	Consequence	Variant_Classification	Variant_Type	Reference_Allele	Tumor_Seq_Allele1	Tumor_Seq_Allele2	Tumor_Sample_Barcode	n_ref_count	n_alt_count	HGVSc	HGVSp	HGVSp_Short	Transcript_ID	RefSeq	Protein_position	Codons
CTLA4	GRCh37	2	205000000	205000000	+	missense_variant	Missense_Mutation	SNP	C	C	T	coadread_dfci_2016_1225	ENST00000302823.3:c.311C>T	p.Thr104Met	p.T104M	ENST00000302823	NM_005214.4	104	aCg/aTg	0	p.T104M
CTLA4	GRCh37	2	205000000	205000000	+	stop_gained	Nonsense_Mutation	SNP	C	C	A	coadread_dfci_2016_3064	ENST00000302823.3:c.309C>A	p.Cys103Ter	p.C103*	ENST00000302823	NM_005214.4	103	tgC/tgA	0	p.C103*
CTLA4	GRCh37	2	205000000	205000000	+	frameshift_variant	Frame_Shift_Del	DEL	T	T	-	coadread_dfci_2016_306558	ENST00000302823.3:c.529delT	p.Tyr177IlefsTer10	p.Y177Ifs*10	ENST00000302823	NM_005214.4	175	Ttt/tt	0	p.F176fs
CTLA4	GRCh37	2	205000000	205000000	+	frameshift_variant	Frame_Shift_Ins	INS	-	-	T	coadread_dfci_2016_3092	ENST00000302823.3:c.81dupT	p.Leu28SerfsTer32	p.L28Sfs*32	ENST00000302823	NM_005214.4	25	-/T	0	p.F26fs
CD274	GRCh37	9	5456113	5456113	+	5_prime_UTR_variant	5'UTR	SNP	G	G	T	coadread_dfci_2016_116	ENST00000381577.3:c.-1G>T		*1*	ENST00000381577	NM_014143.3			0
CD274	GRCh37	9	5465595	5465595	+	missense_variant	Missense_Mutation	SNP	G	G	A	coadread_dfci_2016_1226	ENST00000381577.3:c.779G>A	p.Arg260His	p.R260H	ENST00000381577	NM_014143.3	260	cGt/cAt	0	p.R260H
CD274	GRCh37	9	5463103	5463103	+	missense_variant	Missense_Mutation	SNP	G	G	A	coadread_dfci_2016_1231	ENST00000381577.3:c.664G>A	p.Ala222Thr	p.A222T	ENST00000381577	NM_014143.3	222	Gct/Act	0	p.A222T
CD274	GRCh37	9	5456146	5456146	+	synonymous_variant	Silent	SNP	C	C	A	coadread_dfci_2016_3640	ENST00000381577.3:c.33C>A	p.Thr11=	p.T11=	ENST00000381577	NM_014143.3	11	acC/acA	0	p.T11T
PDCD1	GRCh37	2	243000000	243000000	+	missense_variant	Missense_Mutation	SNP	G	G	A	coadread_dfci_2016_2257	ENST00000334409.5:c.419C>T	p.Ala140Val	p.A140V	ENST00000334409	NM_005018.2	140	gCa/gTa	0	p.A140V
PDCD1	GRCh37	2	243000000	243000000	+	missense_variant	Missense_Mutation	SNP	C	C	A	coadread_dfci_2016_242594	ENST00000334409.5:c.526G>T	p.Gly176Cys	p.G176C	ENST00000334409	NM_005018.2	176	Ggc/Tgc	0	p.G176C
PDCD1	GRCh37	2	243000000	243000000	+	missense_variant	Missense_Mutation	SNP	C	C	T	coadread_dfci_2016_2429	ENST00000334409.5:c.581G>A	p.Arg194Gln	p.R194Q	ENST00000334409	NM_005018.2	194	cGg/cAg	0	p.R194Q
PDCD1	GRCh37	2	243000000	243000000	+	missense_variant	Missense_Mutation	SNP	G	G	A	coadread_dfci_2016_302124	ENST00000334409.5:c.205C>T	p.Arg69Cys	p.R69C	ENST00000334409	NM_005018.2	69	Cgc/Tgc	0	p.R69C
PDCD1	GRCh37	2	243000000	243000000	+	missense_variant	Missense_Mutation	SNP	G	G	A	coadread_dfci_2016_3235	ENST00000334409.5:c.605C>T	p.Ala202Val	p.A202V	ENST00000334409	NM_005018.2	202	gCc/gTc	0	p.A202V
PDCD1	GRCh37	2	243000000	243000000	+	stop_gained	Nonsense_Mutation	SNP	C	C	A	coadread_dfci_2016_3263	ENST00000334409.5:c.250G>T	p.Glu84Ter	p.E84*	ENST00000334409	NM_005018.2	84	Gag/Tag	0	p.E84*
PDCD1	GRCh37	2	243000000	243000000	+	missense_variant	Missense_Mutation	SNP	G	G	A	coadread_dfci_2016_335135	ENST00000334409.5:c.395C>T	p.Ala132Val	p.A132V	ENST00000334409	NM_005018.2	132	gCg/gTg	0	p.A132V
PDCD1	GRCh37	2	243000000	243000000	+	missense_variant	Missense_Mutation	SNP	C	C	T	coadread_dfci_2016_3483	ENST00000334409.5:c.715G>A	p.Val239Met	p.V239M	ENST00000334409	NM_005018.2	239	Gtg/Atg	0	p.V239M
PDCD1	GRCh37	2	243000000	243000000	+	missense_variant	Missense_Mutation	SNP	G	G	A	coadread_dfci_2016_3671	ENST00000334409.5:c.790C>T	p.Arg264Cys	p.R264C	ENST00000334409	NM_005018.2	264	Cgc/Tgc	0	p.R264C
PDCD1	GRCh37	2	243000000	243000000	+	missense_variant	Missense_Mutation	SNP	T	T	C	coadread_dfci_2016_3729	ENST00000334409.5:c.469A>G	p.Ser157Gly	p.S157G	ENST00000334409	NM_005018.2	157	Agc/Ggc	0	p.S157G
PDCD1	GRCh37	2	243000000	243000000	+	missense_variant	Missense_Mutation	SNP	G	G	A	coadread_dfci_2016_4525	ENST00000334409.5:c.610C>T	p.Arg204Cys	p.R204C	ENST00000334409	NM_005018.2	204	Cgc/Tgc	0	p.R204C
PDCD1	GRCh37	2	243000000	243000000	+	missense_variant	Missense_Mutation	SNP	G	G	A	coadread_dfci_2016_694	ENST00000334409.5:c.205C>T	p.Arg69Cys	p.R69C	ENST00000334409	NM_005018.2	69	Cgc/Tgc	0	p.R69C
PDCD1LG2	GRCh37	9	5549555	5549555	+	synonymous_variant	Silent	SNP	C	C	T	coadread_dfci_2016_116	ENST00000397747.3:c.582C>T	p.Phe194=	p.F194=	ENST00000397747	NM_025239.3	194	ttC/ttT	0	p.F194F
PDCD1LG2	GRCh37	9	5522548	5522548	+	start_lost	Translation_Start_Site	SNP	T	T	C	coadread_dfci_2016_270033	ENST00000397747.3:c.2T>C	p.Met1?	p.M1?	ENST00000397747	NM_025239.3	1	aTg/aCg	0	p.M1T
PDCD1LG2	GRCh37	9	5535013	5535013	+	synonymous_variant	Silent	SNP	C	C	T	coadread_dfci_2016_593	ENST00000397747.3:c.324C>T	p.Val108=	p.V108=	ENST00000397747	NM_025239.3	108	gtC/gtT	0	p.V108V
ADORA2A	GRCh37	22	24837235	24837235	+	synonymous_variant	Silent	SNP	C	C	T	coadread_dfci_2016_115875	ENST00000337539.7:c.1017C>T	p.Asn339=	p.N339=	ENST00000337539	NM_001278499.1	339	aaC/aaT	0	p.N339N
ADORA2A	GRCh37	22	24837105	24837105	+	missense_variant	Missense_Mutation	SNP	G	G	A	coadread_dfci_2016_1231	ENST00000337539.7:c.887G>A	p.Arg296His	p.R296H	ENST00000337539	NM_001278499.1	296	cGc/cAc	0	p.R296H
ADORA2A	GRCh37	22	24829388	24829388	+	missense_variant	Missense_Mutation	SNP	T	T	C	coadread_dfci_2016_140903	ENST00000337539.7:c.16T>C	p.Ser6Pro	p.S6P	ENST00000337539	NM_001278499.1	6	Tcc/Ccc	0	p.S6P
ADORA2A	GRCh37	22	24836830	24836830	+	synonymous_variant	Silent	SNP	G	G	A	coadread_dfci_2016_2252	ENST00000337539.7:c.612G>A	p.Ala204=	p.A204=	ENST00000337539	NM_001278499.1	204	gcG/gcA	0	p.A204A
ADORA2A	GRCh37	22	24836569	24836569	+	synonymous_variant	Silent	SNP	C	C	T	coadread_dfci_2016_2939	ENST00000337539.7:c.351C>T	p.Thr117=	p.T117=	ENST00000337539	NM_001278499.1	117	acC/acT	0	p.T117T
ADORA2A	GRCh37	22	24829667	24829667	+	missense_variant	Missense_Mutation	SNP	G	G	A	coadread_dfci_2016_3029	ENST00000337539.7:c.295G>A	p.Ala99Thr	p.A99T	ENST00000337539	NM_001278499.1	99	Gcc/Acc	0	p.A99T
ADORA2A	GRCh37	22	24837116	24837116	+	missense_variant	Missense_Mutation	SNP	C	C	T	coadread_dfci_2016_3064	ENST00000337539.7:c.898C>T	p.Arg300Cys	p.R300C	ENST00000337539	NM_001278499.1	300	Cgc/Tgc	0	p.R300C
ADORA2A	GRCh37	22	24829636	24829636	+	synonymous_variant	Silent	SNP	G	G	A	coadread_dfci_2016_3091	ENST00000337539.7:c.264G>A	p.Thr88=	p.T88=	ENST00000337539	NM_001278499.1	88	acG/acA	0	p.T88T
ADORA2A	GRCh37	22	24829399	24829399	+	synonymous_variant	Silent	SNP	C	C	T	coadread_dfci_2016_3535	ENST00000337539.7:c.27C>T	p.Tyr9=	p.Y9=	ENST00000337539	NM_001278499.1	9	taC/taT	0	p.Y9Y
ADORA2A	GRCh37	22	24836883	24836883	+	missense_variant	Missense_Mutation	SNP	G	G	A	coadread_dfci_2016_3669	ENST00000337539.7:c.665G>A	p.Arg222Gln	p.R222Q	ENST00000337539	NM_001278499.1	222	cGg/cAg	0	p.R222Q
ADORA2A	GRCh37	22	24829401	24829401	+	missense_variant	Missense_Mutation	SNP	T	T	C	coadread_dfci_2016_3724	ENST00000337539.7:c.29T>C	p.Ile10Thr	p.I10T	ENST00000337539	NM_001278499.1	10	aTc/aCc	0	p.I10T
ADORA2A	GRCh37	22	24836883	24836883	+	missense_variant	Missense_Mutation	SNP	G	G	A	coadread_dfci_2016_412	ENST00000337539.7:c.665G>A	p.Arg222Gln	p.R222Q	ENST00000337539	NM_001278499.1	222	cGg/cAg	0	p.R222Q
ADORA2A	GRCh37	22	24836639	24836639	+	synonymous_variant	Silent	SNP	C	C	T	coadread_dfci_2016_523	ENST00000337539.7:c.421C>T	p.Leu141=	p.L141=	ENST00000337539	NM_001278499.1	141	Cta/Tta	0	p.L141L
ADORA2A	GRCh37	22	24836821	24836821	+	missense_variant	Missense_Mutation	SNP	C	C	A	coadread_dfci_2016_593	ENST00000337539.7:c.603C>A	p.Phe201Leu	p.F201L	ENST00000337539	NM_001278499.1	201	ttC/ttA	0	p.F201L
ADORA2A	GRCh37	22	24837095	24837095	+	missense_variant	Missense_Mutation	SNP	C	C	T	coadread_dfci_2016_68	ENST00000337539.7:c.877C>T	p.Arg293Cys	p.R293C	ENST00000337539	NM_001278499.1	293	Cgc/Tgc	0	p.R293C
HAVCR2	GRCh37	5	157000000	157000000	+	missense_variant	Missense_Mutation	SNP	C	C	T	coadread_dfci_2016_111	ENST00000307851.4:c.658G>A	p.Gly220Ser	p.G220S	ENST00000307851	NM_032782.4	220	Ggc/Agc	0	p.G220S
HAVCR2	GRCh37	5	157000000	157000000	+	missense_variant	Missense_Mutation	SNP	A	A	G	coadread_dfci_2016_1202	ENST00000307851.4:c.146T>C	p.Val49Ala	p.V49A	ENST00000307851	NM_032782.4	49	gTg/gCg	0	p.V49A
HAVCR2	GRCh37	5	157000000	157000000	+	splice_acceptor_variant	Splice_Site	SNP	C	C	A	coadread_dfci_2016_1208	ENST00000307851.4:c.523-1G>T		p.X175_splice	ENST00000307851	NM_032782.4			0
HAVCR2	GRCh37	5	157000000	157000000	+	splice_donor_variant	Splice_Site	SNP	A	A	G	coadread_dfci_2016_1791	ENST00000307851.4:c.522+2T>C		p.X174_splice	ENST00000307851	NM_032782.4			0
HAVCR2	GRCh37	5	157000000	157000000	+	synonymous_variant	Silent	SNP	C	C	T	coadread_dfci_2016_207430	ENST00000307851.4:c.84G>A	p.Ala28=	p.A28=	ENST00000307851	NM_032782.4	28	gcG/gcA	0	p.A28A
HAVCR2	GRCh37	5	157000000	157000000	+	synonymous_variant	Silent	SNP	G	G	T	coadread_dfci_2016_2257	ENST00000307851.4:c.567C>A	p.Ala189=	p.A189=	ENST00000307851	NM_032782.4	189	gcC/gcA	0	p.A189A
HAVCR2	GRCh37	5	157000000	157000000	+	synonymous_variant	Silent	SNP	T	T	C	coadread_dfci_2016_233366	ENST00000307851.4:c.48A>G	p.Leu16=	p.L16=	ENST00000307851	NM_032782.4	16	ctA/ctG	0	p.L16L
HAVCR2	GRCh37	5	157000000	157000000	+	synonymous_variant	Silent	SNP	C	C	A	coadread_dfci_2016_2364	ENST00000307851.4:c.636G>T	p.Gly212=	p.G212=	ENST00000307851	NM_032782.4	212	ggG/ggT	0	p.G212G
HAVCR2	GRCh37	5	157000000	157000000	+	intron_variant	Intron	DEL	A	A	-	coadread_dfci_2016_3080	ENST00000307851.4:c.522+16delT		*174*	ENST00000307851	NM_032782.4			0
HAVCR2	GRCh37	5	157000000	157000000	+	intron_variant	Intron	DEL	A	A	-	coadread_dfci_2016_3269	ENST00000307851.4:c.522+16delT		*174*	ENST00000307851	NM_032782.4			0
HAVCR2	GRCh37	5	157000000	157000000	+	synonymous_variant	Silent	SNP	C	C	T	coadread_dfci_2016_3641	ENST00000307851.4:c.45G>A	p.Leu15=	p.L15=	ENST00000307851	NM_032782.4	15	ctG/ctA	0	p.L15L
HAVCR2	GRCh37	5	157000000	157000000	+	missense_variant	Missense_Mutation	SNP	G	G	C	coadread_dfci_2016_3653	ENST00000307851.4:c.752C>G	p.Ala251Gly	p.A251G	ENST00000307851	NM_032782.4	251	gCa/gGa	0	p.A251G
HAVCR2	GRCh37	5	157000000	157000000	+	3_prime_UTR_variant	3'UTR	SNP	A	A	C	coadread_dfci_2016_578	ENST00000307851.4:c.*39T>G		*13*	ENST00000307851	NM_032782.4			0
IDO1	GRCh37	8	39775661	39775661	+	frameshift_variant	Frame_Shift_Del	DEL	C	C	-	coadread_dfci_2016_2379	ENST00000518237.1:c.238delC	p.Arg80ValfsTer2	p.R80Vfs*2	ENST00000518237	NM_002164.5	80	Cgt/gt	0	p.R80fs
IDO1	GRCh37	8	39785478	39785478	+	missense_variant	Missense_Mutation	SNP	G	G	T	coadread_dfci_2016_3535	ENST00000518237.1:c.986G>T	p.Arg329Leu	p.R329L	ENST00000518237	NM_002164.5	329	cGg/cTg	0	p.R329L
IDO1	GRCh37	8	39782260	39782260	+	missense_variant	Missense_Mutation	SNP	T	T	G	coadread_dfci_2016_3611	ENST00000518237.1:c.676T>G	p.Phe226Val	p.F226V	ENST00000518237	NM_002164.5	226	Ttt/Gtt	0	p.F226V
IDO2	GRCh37	8	39872889	39872889	+	missense_variant	Missense_Mutation	SNP	C	C	A	coadread_dfci_2016_1205	ENST00000389060.4:c.992C>A	p.Thr331Lys	p.T331K	ENST00000389060	331	aCa/aAa	0	p.T344K
IDO2	GRCh37	8	39806723	39806723	+	synonymous_variant	Silent	SNP	A	A	G	coadread_dfci_2016_3643	ENST00000389060.4:c.39A>G	p.Pro13=	p.P13=	ENST00000389060	13	ccA/ccG	0	p.P26P
LAG3	GRCh37	12	6882903	6882903	+	missense_variant	Missense_Mutation	SNP	G	G	A	coadread_dfci_2016_111	ENST00000203629.2:c.247G>A	p.Gly83Ser	p.G83S	ENST00000203629	NM_002286.5	83	Ggc/Agc	0	p.G83S
LAG3	GRCh37	12	6887064	6887064	+	missense_variant	Missense_Mutation	SNP	G	G	A	coadread_dfci_2016_1170	ENST00000203629.2:c.1408G>A	p.Gly470Ser	p.G470S	ENST00000203629	NM_002286.5	470	Ggc/Agc	0	p.G470S
LAG3	GRCh37	12	6887113	6887113	+	intron_variant	Intron	DEL	C	C	-	coadread_dfci_2016_1212	ENST00000203629.2:c.1431+31delC		*477*	ENST00000203629	NM_002286.5			0
LAG3	GRCh37	12	6882880	6882880	+	frameshift_variant	Frame_Shift_Del	DEL	C	C	-	coadread_dfci_2016_189255	ENST00000203629.2:c.228delC	p.Gly77AlafsTer26	p.G77Afs*26	ENST00000203629	NM_002286.5	75	gCc/gc	0	p.A75fs
LAG3	GRCh37	12	6882388	6882388	+	missense_variant	Missense_Mutation	SNP	C	C	T	coadread_dfci_2016_207	ENST00000203629.2:c.89C>T	p.Pro30Leu	p.P30L	ENST00000203629	NM_002286.5	30	cCg/cTg	0	p.P30L
LAG3	GRCh37	12	6887526	6887526	+	synonymous_variant	Silent	SNP	C	C	T	coadread_dfci_2016_2263	ENST00000203629.2:c.1548C>T	p.Pro516=	p.P516=	ENST00000203629	NM_002286.5	516	ccC/ccT	0	p.P516P
LAG3	GRCh37	12	6886596	6886596	+	synonymous_variant	Silent	SNP	G	G	A	coadread_dfci_2016_2269	ENST00000203629.2:c.1224G>A	p.Gln408=	p.Q408=	ENST00000203629	NM_002286.5	408	caG/caA	0	p.Q408Q
LAG3	GRCh37	12	6887501	6887501	+	missense_variant	Missense_Mutation	SNP	C	C	T	coadread_dfci_2016_306558	ENST00000203629.2:c.1523C>T	p.Pro508Leu	p.P508L	ENST00000203629	NM_002286.5	508	cCg/cTg	0	p.P508L
LAG3	GRCh37	12	6887514	6887514	+	synonymous_variant	Silent	SNP	G	G	A	coadread_dfci_2016_3167	ENST00000203629.2:c.1536G>A	p.Pro512=	p.P512=	ENST00000203629	NM_002286.5	512	ccG/ccA	0	p.P512P
LAG3	GRCh37	12	6887457	6887457	+	synonymous_variant	Silent	SNP	G	G	A	coadread_dfci_2016_3263	ENST00000203629.2:c.1479G>A	p.Pro493=	p.P493=	ENST00000203629	NM_002286.5	493	ccG/ccA	0	p.P493P
LAG3	GRCh37	12	6887123	6887123	+	intron_variant	Intron	SNP	G	G	A	coadread_dfci_2016_335135	ENST00000203629.2:c.1431+36G>A		*477*	ENST00000203629	NM_002286.5			0
LAG3	GRCh37	12	6883771	6883771	+	frameshift_variant	Frame_Shift_Del	DEL	C	C	-	coadread_dfci_2016_3640	ENST00000203629.2:c.527delC	p.Pro176GlnfsTer12	p.P176Qfs*12	ENST00000203629	NM_002286.5	174	agC/ag	0	p.S174fs
LAG3	GRCh37	12	6883890	6883890	+	missense_variant	Missense_Mutation	SNP	G	G	A	coadread_dfci_2016_3676	ENST00000203629.2:c.641G>A	p.Arg214Gln	p.R214Q	ENST00000203629	NM_002286.5	214	cGg/cAg	0	p.R214Q
LAG3	GRCh37	12	6887519	6887519	+	missense_variant	Missense_Mutation	SNP	C	C	T	coadread_dfci_2016_3724	ENST00000203629.2:c.1541C>T	p.Pro514Leu	p.P514L	ENST00000203629	NM_002286.5	514	cCg/cTg	0	p.P514L
LAG3	GRCh37	12	6884492	6884492	+	missense_variant	Missense_Mutation	SNP	G	G	T	coadread_dfci_2016_3729	ENST00000203629.2:c.835G>T	p.Gly279Trp	p.G279W	ENST00000203629	NM_002286.5	279	Ggg/Tgg	0	p.G279W
LAG3	GRCh37	12	6887112	6887112	+	intron_variant	Intron	SNP	G	G	A	coadread_dfci_2016_4500	ENST00000203629.2:c.1431+25G>A		*477*	ENST00000203629	NM_002286.5			0
LAG3	GRCh37	12	6887004	6887004	+	missense_variant	Missense_Mutation	SNP	C	C	A	coadread_dfci_2016_523	ENST00000203629.2:c.1348C>A	p.Leu450Ile	p.L450I	ENST00000203629	NM_002286.5	450	Ctc/Atc	0	p.L450I
LAG3	GRCh37	12	6883890	6883890	+	missense_variant	Missense_Mutation	SNP	G	G	A	coadread_dfci_2016_561	ENST00000203629.2:c.641G>A	p.Arg214Gln	p.R214Q	ENST00000203629	NM_002286.5	214	cGg/cAg	0	p.R214Q
LAG3	GRCh37	12	6882877	6882877	+	missense_variant	Missense_Mutation	SNP	C	C	A	coadread_dfci_2016_627	ENST00000203629.2:c.221C>A	p.Ala74Asp	p.A74D	ENST00000203629	NM_002286.5	74	gCc/gAc	0	p.A74D
LAG3	GRCh37	12	6886999	6886999	+	missense_variant	Missense_Mutation	SNP	G	G	A	coadread_dfci_2016_68	ENST00000203629.2:c.1343G>A	p.Gly448Asp	p.G448D	ENST00000203629	NM_002286.5	448	gGc/gAc	0	p.G448D
TIGIT	GRCh37	3	114000000	114000000	+	missense_variant	Missense_Mutation	SNP	C	C	T	coadread_dfci_2016_1225	ENST00000383671.3:c.89C>T	p.Thr30Met	p.T30M	ENST00000383671	NM_173799.3	30	aCg/aTg	0	p.T97M
TIGIT	GRCh37	3	114000000	114000000	+	3_prime_UTR_variant	3'UTR	SNP	T	T	C	coadread_dfci_2016_1804	ENST00000383671.3:c.*25T>C		*9*	ENST00000383671	NM_173799.3			0
TIGIT	GRCh37	3	114000000	114000000	+	synonymous_variant	Silent	SNP	A	A	C	coadread_dfci_2016_2227	ENST00000383671.3:c.694A>C	p.Arg232=	p.R232=	ENST00000383671	NM_173799.3	232	Aga/Cga	0	p.R299R
TIGIT	GRCh37	3	114000000	114000000	+	missense_variant	Missense_Mutation	SNP	C	C	A	coadread_dfci_2016_2448	ENST00000383671.3:c.604C>A	p.Gln202Lys	p.Q202K	ENST00000383671	NM_173799.3	202	Cag/Aag	0	p.Q269K
TIGIT	GRCh37	3	114000000	114000000	+	missense_variant	Missense_Mutation	SNP	A	A	C	coadread_dfci_2016_2624	ENST00000383671.3:c.528A>C	p.Glu176Asp	p.E176D	ENST00000383671	NM_173799.3	176	gaA/gaC	0	p.E243D
TIGIT	GRCh37	3	114000000	114000000	+	missense_variant	Missense_Mutation	SNP	G	G	A	coadread_dfci_2016_2775	ENST00000383671.3:c.475G>A	p.Val159Met	p.V159M	ENST00000383671	NM_173799.3	159	Gtg/Atg	0	p.V226M
TIGIT	GRCh37	3	114000000	114000000	+	missense_variant	Missense_Mutation	SNP	G	G	A	coadread_dfci_2016_287	ENST00000383671.3:c.475G>A	p.Val159Met	p.V159M	ENST00000383671	NM_173799.3	159	Gtg/Atg	0	p.V226M
TIGIT	GRCh37	3	114000000	114000000	+	3_prime_UTR_variant	3'UTR	SNP	G	G	A	coadread_dfci_2016_2926	ENST00000383671.3:c.*104G>A		*35*	ENST00000383671	NM_173799.3			0
TIGIT	GRCh37	3	114000000	114000000	+	3_prime_UTR_variant	3'UTR	SNP	G	G	A	coadread_dfci_2016_2936	ENST00000383671.3:c.*49G>A		*17*	ENST00000383671	NM_173799.3			0
TIGIT	GRCh37	3	114000000	114000000	+	missense_variant	Missense_Mutation	SNP	G	G	T	coadread_dfci_2016_3116	ENST00000383671.3:c.219G>T	p.Leu73Phe	p.L73F	ENST00000383671	NM_173799.3	73	ttG/ttT	0	p.L140F
TIGIT	GRCh37	3	114000000	114000000	+	3_prime_UTR_variant	3'UTR	SNP	G	G	A	coadread_dfci_2016_3321	ENST00000383671.3:c.*108G>A		*36*	ENST00000383671	NM_173799.3			0
TIGIT	GRCh37	3	114000000	114000000	+	synonymous_variant	Silent	SNP	G	G	A	coadread_dfci_2016_352983	ENST00000383671.3:c.486G>A	p.Ala162=	p.A162=	ENST00000383671	NM_173799.3	162	gcG/gcA	0	p.A229A
C10orf54	GRCh37	10	73521752	73521752	+	synonymous_variant	Silent	SNP	C	C	T	coadread_dfci_2016_2417	ENST00000394957.3:c.114G>A	p.Pro38=	p.P38=	ENST00000394957	NM_022153.1	38	ccG/ccA	0	p.P38P
C10orf54	GRCh37	10	73511467	73511467	+	frameshift_variant	Frame_Shift_Del	DEL	G	G	-	coadread_dfci_2016_2564	ENST00000394957.3:c.856delC	p.Leu286CysfsTer51	p.L286Cfs*51	ENST00000394957	NM_022153.1	286	Ctg/tg	0	p.L286fs
C10orf54	GRCh37	10	73511497	73511497	+	missense_variant	Missense_Mutation	SNP	G	G	A	coadread_dfci_2016_293	ENST00000394957.3:c.826C>T	p.Arg276Trp	p.R276W	ENST00000394957	NM_022153.1	276	Cgg/Tgg	0	p.R276W
C10orf54	GRCh37	10	73521776	73521776	+	synonymous_variant	Silent	SNP	C	C	T	coadread_dfci_2016_3451	ENST00000394957.3:c.90G>A	p.Val30=	p.V30=	ENST00000394957	NM_022153.1	30	gtG/gtA	0	p.V30V
C10orf54	GRCh37	10	73511467	73511467	+	frameshift_variant	Frame_Shift_Del	DEL	G	G	-	coadread_dfci_2016_3676	ENST00000394957.3:c.856delC	p.Leu286CysfsTer51	p.L286Cfs*51	ENST00000394957	NM_022153.1	286	Ctg/tg	0	p.L286fs
C10orf54	GRCh37	10	73511474	73511474	+	synonymous_variant	Silent	SNP	G	G	A	coadread_dfci_2016_3721	ENST00000394957.3:c.849C>T	p.Ser283=	p.S283=	ENST00000394957	NM_022153.1	283	agC/agT	0	p.S283S
C10orf54	GRCh37	10	73521755	73521755	+	synonymous_variant	Silent	SNP	C	C	T	coadread_dfci_2016_3729	ENST00000394957.3:c.111G>A	p.Thr37=	p.T37=	ENST00000394957	NM_022153.1	37	acG/acA	0	p.T37T
C10orf54	GRCh37	10	73521654	73521654	+	missense_variant	Missense_Mutation	SNP	G	G	A	coadread_dfci_2016_444	ENST00000394957.3:c.212C>T	p.Thr71Met	p.T71M	ENST00000394957	NM_022153.1	71	aCg/aTg	0	p.T71M
VTCN1	GRCh37	1	118000000	118000000	+	intron_variant	Intron	DEL	AG	AG	-	coadread_dfci_2016_233366	ENST00000369458.3:c.33-10_33-9delCT		*11*	ENST00000369458	NM_024626.3			0
VTCN1	GRCh37	1	118000000	118000000	+	missense_variant	Missense_Mutation	SNP	C	C	T	coadread_dfci_2016_2812	ENST00000369458.3:c.743G>A	p.Arg248Gln	p.R248Q	ENST00000369458	NM_024626.3	248	cGg/cAg	0	p.R248Q
VTCN1	GRCh37	1	118000000	118000000	+	synonymous_variant	Silent	SNP	G	G	A	coadread_dfci_2016_578	ENST00000369458.3:c.126C>T	p.Val42=	p.V42=	ENST00000369458	NM_024626.3	42	gtC/gtT	0	p.V42V
VTCN1	GRCh37	1	118000000	118000000	+	missense_variant	Missense_Mutation	SNP	C	C	A	coadread_dfci_2016_578	ENST00000369458.3:c.370G>T	p.Asp124Tyr	p.D124Y	ENST00000369458	NM_024626.3	124	Gat/Tat	0	p.D124Y
Overall, a total of 100 SNVs and Indels, containing missense/inframe, deleterious, silent, or intron/RNA somatic point mutations were detected within the 12 immune checkpoints.
